# Supplementary material for: Severe Hypercapnia during Anaesthesia under Mechanical Ventilation in Two Paediatric Patients
Source: MDPI journal article supplement (doi:10.3390/ani13040663), 2023-02-14
Supplement: s1 [file s1]

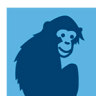

**Table S1.** Recorded values of  $V_T$  measured by the ventilator, and  $V_T$ , PIP, PEEP and  $C_D$  measured by the spirometer in case No 1.

| Time Point     | $V_T$ (mL) Ventilator Setting | $V_{T\text{ INS}}/V_{T\text{ EXP}}$ (mL) on Spirometer | PIP/PEEP (cmH <sub>2</sub> O) on Spirometer | $C_D$ (mL/cmH <sub>2</sub> O) on Spirometer | ETCO <sub>2</sub> (mmHg) |
|----------------|-------------------------------|--------------------------------------------------------|---------------------------------------------|---------------------------------------------|--------------------------|
| T <sub>1</sub> | 20                            | No recording                                           | No recording                                |                                             | 37–40                    |
| T <sub>2</sub> | 50                            | 22/14                                                  | 13/0                                        | 1.2                                         | 37–40                    |
| T <sub>3</sub> | 50                            |                                                        |                                             | 1.3                                         |                          |
| T <sub>4</sub> | 50                            |                                                        |                                             | 1.9                                         | 116                      |
| T <sub>5</sub> | Off                           | 38/34                                                  | 14–20/0                                     |                                             | 58                       |

T<sub>1</sub> = start of VCV, after atracurium was given; T<sub>2</sub> = after increase in  $V_T$  setting on the ventilator; T<sub>3</sub> = after first recruitment manoeuvre (stepwise increase of PEEP up to 10 cmH<sub>2</sub>O); T<sub>4</sub> = after second recruitment manoeuvre (PIP of 20 cmH<sub>2</sub>O for 20 s); T<sub>5</sub> = manual ventilation.

**Table S2.** Recorded values of  $V_T$  measured by the ventilator, and  $V_T$ , PIP, PEEP and  $C_D$  measured by the spirometer in case No 2.

| Time Point     | $V_T$ (mL) Ventilator Setting | $V_{T\text{ INS}}/V_{T\text{ EXP}}$ (mL) on Spirometer | PIP/PEEP (cmH <sub>2</sub> O) on Spirometer | $C_D$ (mL/cmH <sub>2</sub> O) on Spirometer | ETCO <sub>2</sub> (mmHg) |
|----------------|-------------------------------|--------------------------------------------------------|---------------------------------------------|---------------------------------------------|--------------------------|
| T <sub>1</sub> | 45                            | 25/20                                                  | 8/0                                         | 2.2                                         | 71                       |
| T <sub>2</sub> | 50                            | 25/20                                                  | 9/0                                         | 2                                           | 95                       |
| T <sub>3</sub> |                               |                                                        |                                             |                                             | 197                      |
| T <sub>4</sub> |                               |                                                        | 12–25/0                                     |                                             |                          |
| T <sub>5</sub> |                               |                                                        |                                             |                                             | 65                       |

T<sub>1</sub> = start of VCV, after atracurium was given; T<sub>2</sub> = 25 min after atracurium; T<sub>3</sub> = after recruitment manoeuvre (PIP of 20 cmH<sub>2</sub>O for 20 s with a PEEP of 5 cm cmH<sub>2</sub>O after); T<sub>4</sub> = manual ventilation; T<sub>5</sub> = end of anaesthesia.
